# Supplementary material for: THC Reduces Ki67-Immunoreactive Cells Derived from Human Primary Glioblastoma in a GPR55-Dependent Manner
Source: PubMed Central journal article supplement (PMC7959141; doi:10.3390/cancers13051064), 2021-03-03
Supplement: cancers-13-01064-s001.pdf [file cancers-13-01064-s001.pdf]

# Supplementary Materials:

## THC Reduces Ki67-Immunoreactive Cells Derived from Human Primary Glioblastoma in a GPR55-Dependent Manner

Marc Richard Kolbe <sup>1</sup>, Tim Hohmann <sup>1</sup>, Urszula Hohmann <sup>1</sup>, Chalid Ghadban <sup>1</sup>, Ken Mackie <sup>2</sup>, Christin Zöller <sup>3</sup>, Julian Prell <sup>3</sup>, Jörg Illert <sup>3</sup>, Christian Strauss <sup>3</sup> and Faramarz Dehghani <sup>1,\*</sup>

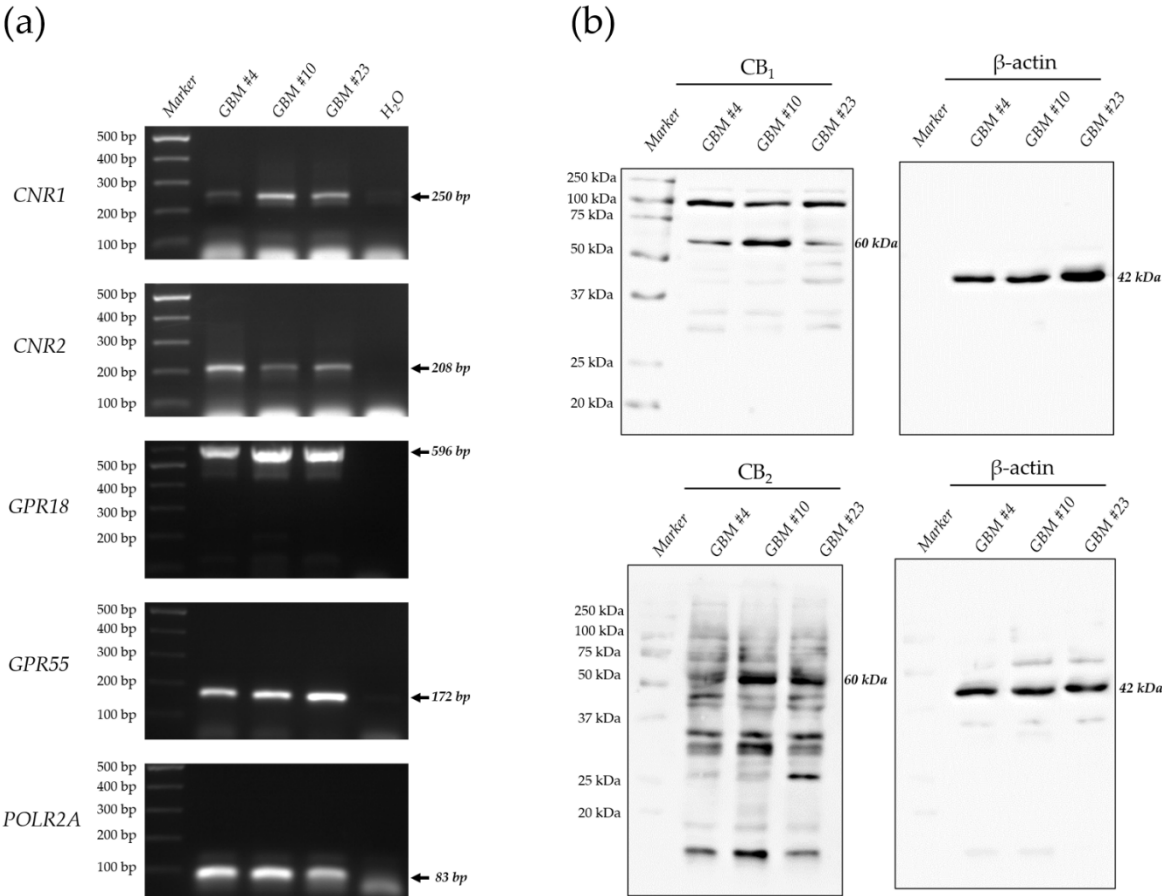

Figure 1. Original images of PCR products and Western Blots.

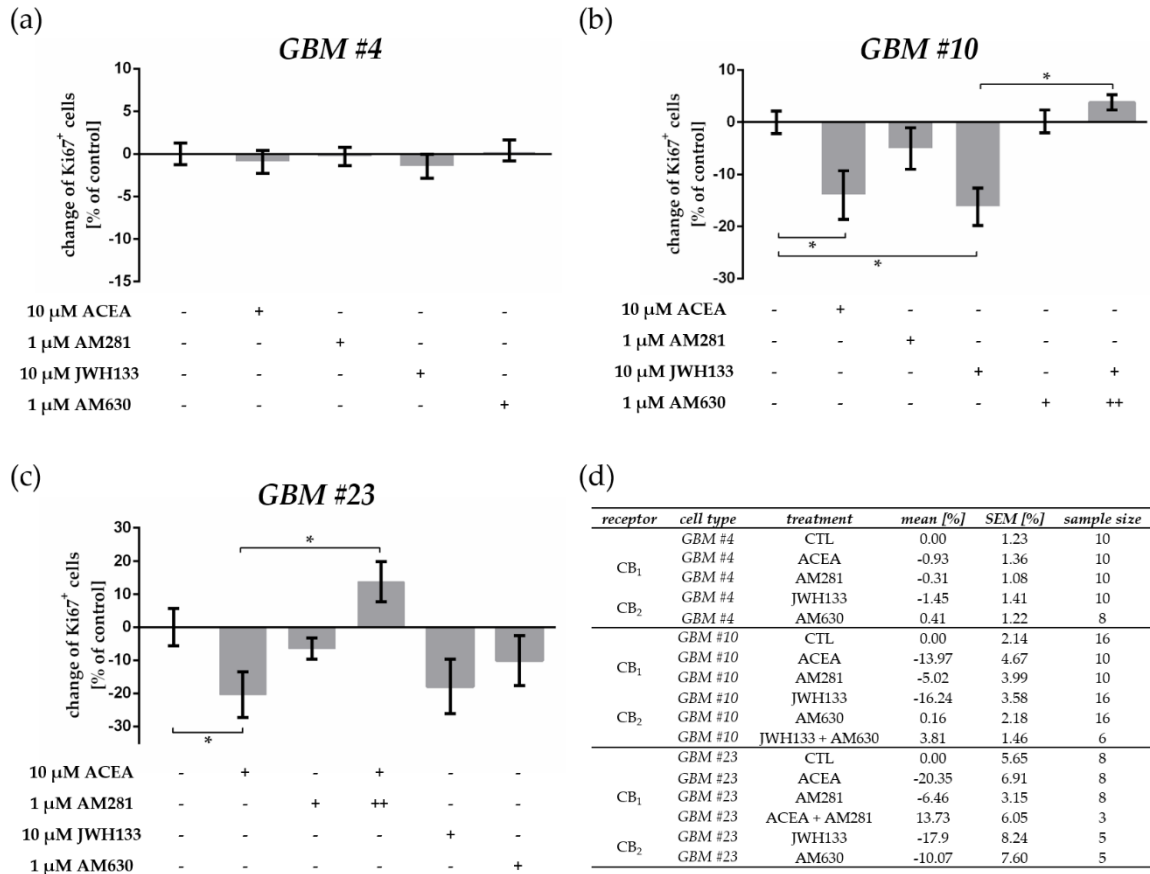

**Figure S2:** Influence and receptor dependence of CB<sub>1</sub> and CB<sub>2</sub> ligands on the percentage of Ki67<sup>+</sup> cells. The cannabinoids ACEA (CB<sub>1</sub>-agonist, 10  $\mu$ M), JWH133 (CB<sub>2</sub>-Agonist, 10  $\mu$ M), AM281 (CB<sub>1</sub>-antagonist, 1  $\mu$ M) and AM630 (CB<sub>2</sub>-antagonist, 1  $\mu$ M) were used to target CB<sub>1</sub> and CB<sub>2</sub> receptor in GBM #4, GBM #10 and GBM #23. (a) Impact of CB<sub>1</sub>- and CB<sub>2</sub>-ligands on the number of Ki67<sup>+</sup> cells of GBM #4. Cells remained unaffected after treatment with ACEA, JWH133, AM281 and AM630 for 24 h. (b) Impact of CB<sub>1</sub>- and CB<sub>2</sub>-ligands on number of Ki67<sup>+</sup> cells of GBM #10. Application of ACEA and JWH133 led to a significant decreased number of Ki67<sup>+</sup> cells compared to the control group. AM281 and AM630 alone caused no changes. By co-application with AM630, the effect of JWH133 was significantly abolished and CB<sub>2</sub>-activation by JWH133 was identified as underlying mechanism. (c) Impact of CB<sub>1</sub>- and CB<sub>2</sub>-ligands on number of Ki67-immunoreactive cells of GBM #23. Treatment with different CB<sub>1</sub> and CB<sub>2</sub> ligands revealed a reduced number of Ki67-labelled cells upon ACEA exposure in comparison to the control group. This process was dependent on the activation of CB<sub>1</sub>, since CB<sub>1</sub>-antagonist AM281 prevented ACEA-mediated effect when both were co-applied. JWH133, AM281 and AM630 alone caused no significant changes. (d) Exact measurement values and sample sizes after treatment with CB<sub>1</sub>- and CB<sub>2</sub>-ligands. To completely block CB<sub>1</sub> and CB<sub>2</sub>, antagonists were applied 15 min (++) before agonists were subsequently added. Data are means  $\pm$  SEM of N=3-8 independent experiments performed in duplicate. Significance was chosen for  $p < 0.05$ . The asterisk denotes significant results regarding the respective measurement indicated with the bar.

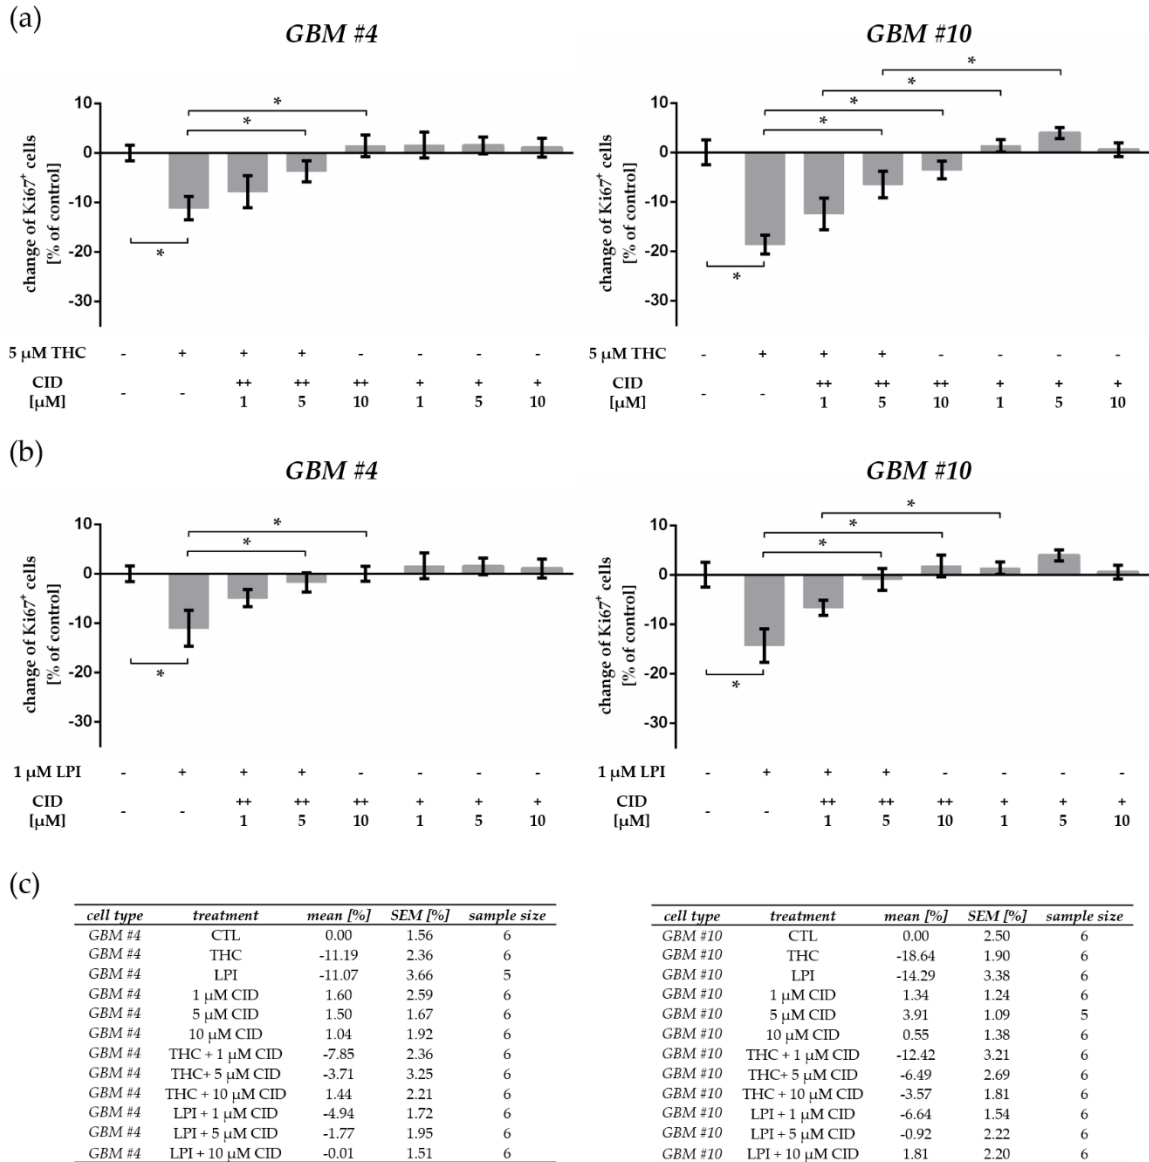

**Figure S3:** Establishment of GPR55 antagonist CID16020046 (CID). **(a)** Influence of increasing concentration of CID in presence of THC. The effects of THC were significantly abolished after pre-treatment with 5 μM or 10 μM CID in *GBM #4* and *GBM #10*. CID alone had no significant effects. **(b)** Influence of increasing concentration of CID in presence of LPI. 5 μM or 10 μM CID were sufficient to block LPI effects completely. CID alone had no significant effects. **(c)** Exact measurement values and sample sizes after treatment with increasing concentration of CID. Data are means ± SEM of N=3 independent experiments performed in duplicate. To completely block GPR55 CID were applied 15 min (++) before THC or LPI were subsequently added. Significance was chosen for  $p < 0.05$ . The asterisk denotes significant results regarding the respective measurement indicated with the bar.

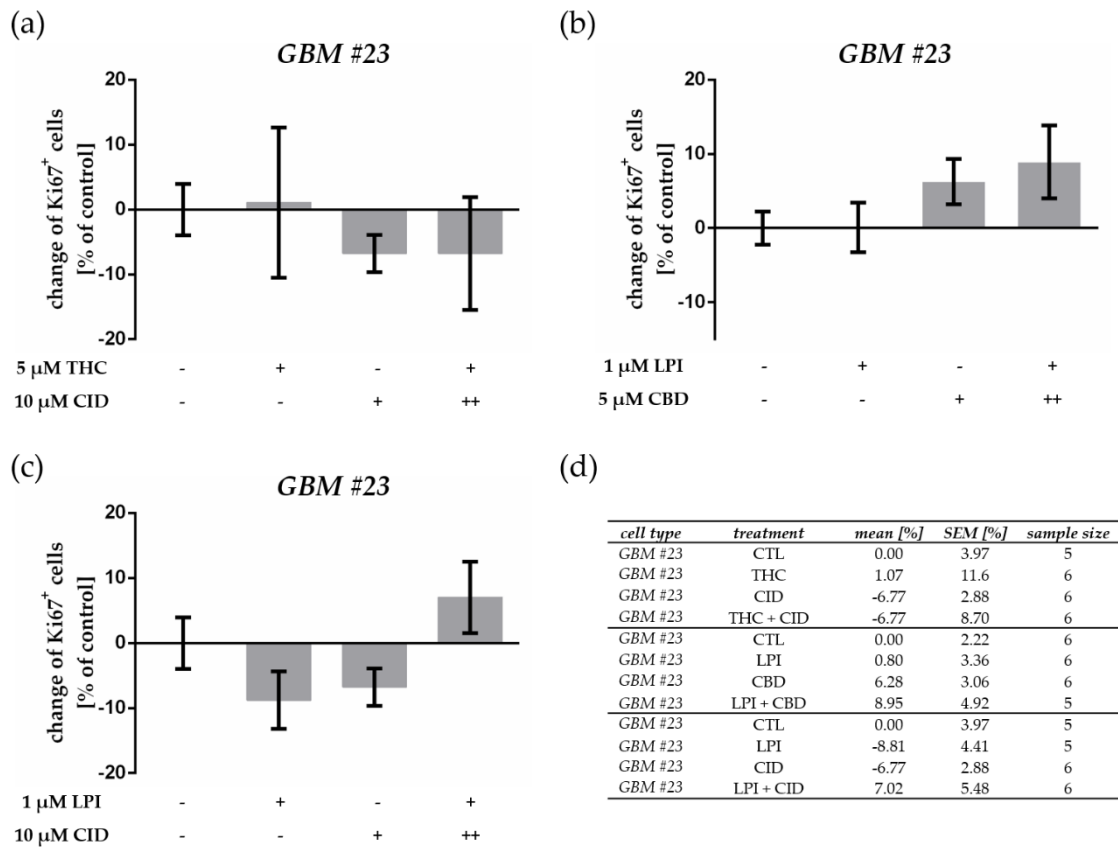

**Figure S4:** Impact of GPR55 ligands on the percentage of Ki67<sup>+</sup> cells in GBM #23. **(a)** Impact of THC and CID16020046 (CID) on the number of Ki67-labelled GBM cells. Application of THC (5  $\mu\text{M}$ ) did not alter the percentage of Ki67<sup>+</sup> cells alone and in combination with CID (10  $\mu\text{M}$ ). CID alone displayed also no significant effects. **(b)** Impact of LPI and CBD on the number of Ki67-labelled GBM cells. Cells treated with LPI (1  $\mu\text{M}$ ) for 24 h were unaffected through the number of Ki67<sup>+</sup> cells. The combination with GPR55-antagonist CBD had also no significant effects on GBM #23. **(c)** Impact of LPI and CID on the number of Ki67-labelled GBM cells. Graph demonstrates the effects of CID (10  $\mu\text{M}$ ) alone and LPI (1  $\mu\text{M}$ ) in presence of CID. CID alone had no influence on the growth fraction of GBM #23 and did not altered LPI-acting when both were co-applied. **(d)** Exact measurement values and sample sizes after treatment with CB<sub>1</sub>- and CB<sub>2</sub>-ligands. Data are means  $\pm$  SEM of N=3 independent experiments performed in duplicate. To completely block GPR55 CBD and CID were applied 15 min (++) before THC or LPI were subsequently added.

**Table S1.** Data in patients and primary tumor samples of investigated GBM.

|                       |                                  | <i>GBM #4</i>            | <i>GBM #10</i> | <i>GBM #23</i> |            |
|-----------------------|----------------------------------|--------------------------|----------------|----------------|------------|
| primary tumor sample  | sex                              | female                   | male           | female         |            |
|                       | age                              | 50                       | 56             | 83             |            |
|                       | tumor location                   | temporooccipital         | temporal       | central        |            |
|                       | tumor origin                     | <i>de novo</i>           | <i>de novo</i> | <i>de novo</i> |            |
|                       | MGMT <sup>1</sup> promotor       | methylated               | methylated     | unmethylated   |            |
|                       | IDH1 <sup>2</sup> status (R132H) | wildtype                 | wildtype       | wildtype       |            |
| patient-derived cells | MGMT promotor                    | methylated               | methylated     | methylated     |            |
|                       | IDH1 status (R132H)              | wildtype                 | wildtype       | wildtype       |            |
|                       | stem cell marker                 | CD133 <sup>+</sup> cells | <1%            | <1%            | <1%        |
|                       |                                  | SOX2 mRNA                | detectable     | detectable     | detectable |
|                       |                                  | <i>MSI1</i> mRNA         | detectable     | detectable     | detectable |
|                       |                                  | <i>NES</i> mRNA          | detectable     | detectable     | detectable |
|                       |                                  | <i>CD44</i> mRNA         | detectable     | detectable     | detectable |

<sup>1</sup>O-6-methylguanine-DNA methyltransferase; <sup>2</sup> isocitrate dehydrogenase 1

**Table S2.** Exact measurement values and sample sizes after treatment with THC and CBD.

| cell type      | treatment | mean [%] | SEM [%] | sample size |
|----------------|-----------|----------|---------|-------------|
| <i>GBM #4</i>  | CTL       | 0.00     | 2.08    | 10          |
| <i>GBM #4</i>  | THC       | -16.68   | 2.39    | 9           |
| <i>GBM #4</i>  | CBD       | -4.09    | 1.54    | 8           |
| <i>GBM #4</i>  | THC + CBD | -4,75    | 3.33    | 7           |
| <i>GBM #10</i> | CTL       | 0.00     | 2.27    | 7           |
| <i>GBM #10</i> | THC       | -9.11    | 2.62    | 8           |
| <i>GBM #10</i> | CBD       | -1.69    | 2.17    | 7           |
| <i>GBM #10</i> | THC + CBD | -0.55    | 1.78    | 6           |
| <i>GBM #23</i> | CTL       | 0.00     | 2.07    | 10          |
| <i>GBM #23</i> | THC       | -1.39    | 4.05    | 9           |
| <i>GBM #23</i> | CBD       | 1.27     | 2.96    | 9           |
| <i>GBM #23</i> | THC + CBD | -4.55    | 2.91    | 10          |

**Table S3.** Exact measurement values and sample sizes after treatment with THC in presence of different antagonists.

| receptor                         | cell type      | treatment           | mean [%] | SEM [%] | sample size |
|----------------------------------|----------------|---------------------|----------|---------|-------------|
| CB <sub>1</sub> /CB <sub>2</sub> | <i>GBM #4</i>  | CTL                 | 0.00     | 3.17    | 12          |
|                                  | <i>GBM #4</i>  | THC                 | -27.66   | 1.36    | 6           |
|                                  | <i>GBM #4</i>  | AM281 + AM630       | 10.28    | 0.78    | 6           |
|                                  | <i>GBM #4</i>  | THC + AM281 + AM630 | -25.41   | 1.99    | 6           |
|                                  | <i>GBM #10</i> | CTL                 | 0.00     | 3.06    | 12          |
|                                  | <i>GBM #10</i> | THC                 | -21.06   | 3.08    | 6           |
|                                  | <i>GBM #10</i> | AM281 + AM630       | 7.42     | 2.57    | 6           |
|                                  | <i>GBM #10</i> | THC + AM281 + AM630 | -25.58   | 2.47    | 6           |
| GPR18                            | <i>GBM #4</i>  | CTL                 | 0.00     | 3.36    | 6           |
|                                  | <i>GBM #4</i>  | THC                 | -19.02   | 3.70    | 6           |
|                                  | <i>GBM #4</i>  | O-1918              | -7.07    | 3.39    | 6           |
|                                  | <i>GBM #4</i>  | THC + O-1918        | -19.58   | 3.13    | 6           |
|                                  | <i>GBM #10</i> | CTL                 | 0.00     | 1.96    | 6           |
|                                  | <i>GBM #10</i> | THC                 | -20.49   | 4.64    | 6           |
|                                  | <i>GBM #10</i> | O-1918              | -4.118   | 3.08    | 6           |
|                                  | <i>GBM #10</i> | THC + O-1918        | -27.95   | 3.69    | 6           |
| GPR55                            | <i>GBM #4</i>  | CTL                 | 0.00     | 1.56    | 6           |
|                                  | <i>GBM #4</i>  | THC                 | -11.19   | 2.36    | 6           |
|                                  | <i>GBM #4</i>  | CID                 | 1.04     | 1.92    | 6           |
|                                  | <i>GBM #4</i>  | THC + CID           | 1.44     | 2.21    | 6           |
|                                  | <i>GBM #10</i> | CTL                 | 0.00     | 2.50    | 6           |
|                                  | <i>GBM #10</i> | THC                 | -18.64   | 1.90    | 6           |
|                                  | <i>GBM #10</i> | CID                 | 0.55     | 1.38    | 6           |
|                                  | <i>GBM #10</i> | THC + CID           | -3.57    | 1.81    | 6           |

**Table S4.** Exact measurement values and sample sizes after treatment with increasing concentrations of THC in presence of CID.

| cell type      | treatment             | mean [%] | SEM [%] | sample size |
|----------------|-----------------------|----------|---------|-------------|
| <i>GBM #4</i>  | CTL                   | 0.00     | 1.36    | 6           |
| <i>GBM #4</i>  | 0.1 $\mu$ M THC       | -8.52    | 1.62    | 6           |
| <i>GBM #4</i>  | 1 $\mu$ M THC         | -6.45    | 1.69    | 6           |
| <i>GBM #4</i>  | 5 $\mu$ M THC         | -13.72   | 3.24    | 6           |
| <i>GBM #4</i>  | 10 $\mu$ M THC        | -12.53   | 1.56    | 5           |
| <i>GBM #4</i>  | 0.1 $\mu$ M THC + CID | 1.11     | 0.76    | 6           |
| <i>GBM #4</i>  | 1 $\mu$ M THC + CID   | -0.99    | 1.28    | 6           |
| <i>GBM #4</i>  | 5 $\mu$ M THC + CID   | 2.21     | 1.22    | 6           |
| <i>GBM #4</i>  | 10 $\mu$ M THC + CID  | 0.98     | 0.79    | 6           |
| <i>GBM #4</i>  | CID                   | 0.44     | 0.61    | 5           |
| <i>GBM #10</i> | CTL                   | 0.00     | 3.14    | 6           |
| <i>GBM #10</i> | 0.1 $\mu$ M THC       | -7.04    | 1.46    | 6           |
| <i>GBM #10</i> | 1 $\mu$ M THC         | -8.97    | 1.95    | 6           |
| <i>GBM #10</i> | 5 $\mu$ M THC         | -15.48   | 3.49    | 6           |
| <i>GBM #10</i> | 10 $\mu$ M THC        | -16.92   | 2.19    | 5           |
| <i>GBM #10</i> | 0.1 $\mu$ M THC + CID | -2.65    | 3.10    | 6           |
| <i>GBM #10</i> | 1 $\mu$ M THC + CID   | -2.80    | 2.66    | 6           |
| <i>GBM #10</i> | 5 $\mu$ M THC + CID   | -1.26    | 1.35    | 6           |
| <i>GBM #10</i> | 10 $\mu$ M THC + CID  | -5.42    | 2.4     | 6           |
| <i>GBM #10</i> | CID                   | 4.63     | 1.45    | 6           |

**Table S5.** Exact measurement values and sample sizes after treatment with LPI and LPI in presence of CBD and CID.

| cell type      | treatment | mean [%] | SEM [%] | sample size |
|----------------|-----------|----------|---------|-------------|
| <i>GBM #4</i>  | CTL       | 0.00     | 2.26    | 6           |
| <i>GBM #4</i>  | LPI       | -13.11   | 0.82    | 6           |
| <i>GBM #4</i>  | CBD       | -1.70    | 1.29    | 6           |
| <i>GBM #4</i>  | LPI + CBD | -1.35    | 1.75    | 6           |
| <i>GBM #10</i> | CTL       | 0.00     | 3.05    | 6           |
| <i>GBM #10</i> | LPI       | -13.28   | 1.72    | 6           |
| <i>GBM #10</i> | CBD       | 2.81     | 0.54    | 6           |
| <i>GBM #10</i> | LPI + CBD | 3.66     | 1.76    | 6           |
| <i>GBM #4</i>  | CTL       | 0.00     | 1.56    | 6           |
| <i>GBM #4</i>  | LPI       | -11.07   | 3.66    | 6           |
| <i>GBM #4</i>  | CID       | 1.04     | 1.92    | 6           |
| <i>GBM #4</i>  | LPI + CID | -0.01    | 1.51    | 6           |
| <i>GBM #10</i> | CTL       | 0.00     | 2.50    | 6           |
| <i>GBM #10</i> | LPI       | -14.29   | 3.38    | 6           |
| <i>GBM #10</i> | CID       | 0.55     | 1.38    | 6           |
| <i>GBM #10</i> | LPI + CID | 1.81     | 2.20    | 6           |

**Table S6.** Exact measurement values and sample sizes after treatment with LPI and THC co-application.

| cell type      | treatment              | mean [%] | SEM [%] | sample size |
|----------------|------------------------|----------|---------|-------------|
| <i>GBM #4</i>  | CTL                    | 0.00     | 3.36    | 6           |
| <i>GBM #4</i>  | LPI                    | -19.02   | 3.70    | 6           |
| <i>GBM #4</i>  | THC                    | -15.55   | 2.78    | 5           |
| <i>GBM #4</i>  | LPI + THC <sup>1</sup> | -18.69   | 2.60    | 6           |
| <i>GBM #4</i>  | THC + LPI <sup>1</sup> | -19.47   | 3.15    | 6           |
| <i>GBM #10</i> | CTL                    | 0.00     | 1.96    | 6           |
| <i>GBM #10</i> | LPI                    | -20.49   | 4.64    | 6           |
| <i>GBM #10</i> | THC                    | -14.97   | 4.32    | 6           |
| <i>GBM #10</i> | LPI + THC <sup>1</sup> | -20.78   | 2.12    | 6           |
| <i>GBM #10</i> | THC + LPI <sup>1</sup> | -19.69   | 4.21    | 6           |

<sup>1</sup>15 min pre-treatment
